# Supplementary material for: Effect of latent cytomegalovirus infection on the antibody response to influenza vaccination: a systematic review and meta-analysis
Source: PubMed Central journal article supplement (PMC6647367; doi:10.1007/s00430-019-00602-z), 2019-04-04
Supplement: 430_2019_602_MOESM1_ESM.pdf [file 430_2019_602_MOESM1_ESM.pdf]

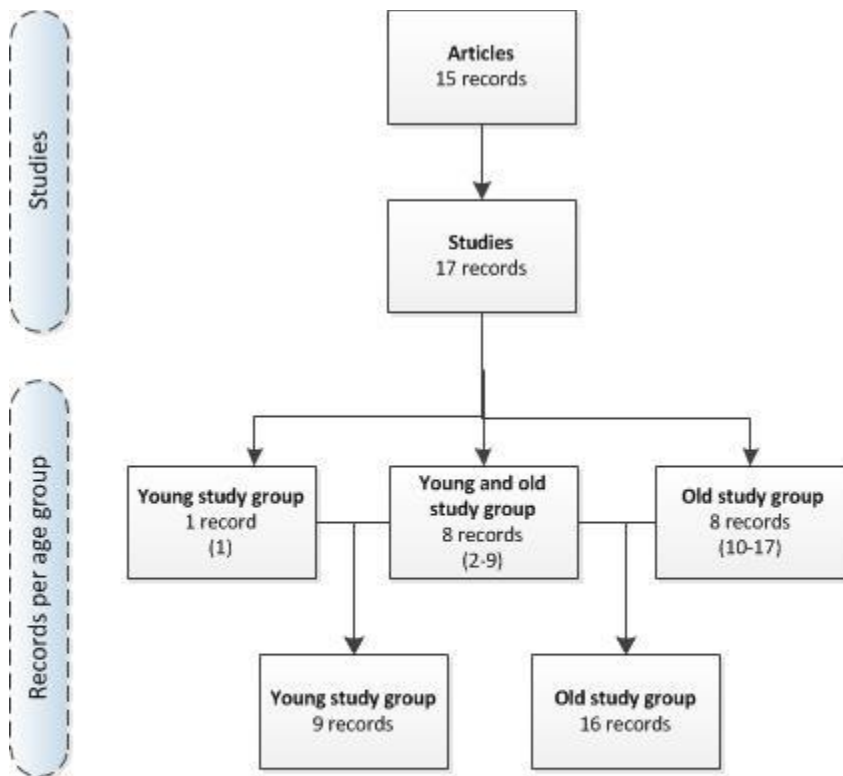

- |                     |                |                  |                 |
|---------------------|----------------|------------------|-----------------|
| (1) Turner et al    | (6) Furman 1   | (11) Moro Gracia | (16) Haq        |
| (2) Nielszen        | (7) Furman 3   | (12) Arias       | (17) Strindhall |
| (3) Derhovanessivan | (8) Furman 3   | (13) Reed        |                 |
| (4) Frasca          | (9) Wald       | (14) Guidi       |                 |
| (5) Trzonkowski     | (10) McElhaney | (15) Den Elzen   |                 |

**Supplementary figure 1. Flow diagram of number of records available for reported conclusions of the effect of CMV on influenza antibody response in young (<60 years of age) or old (>60 years of age) adults.**

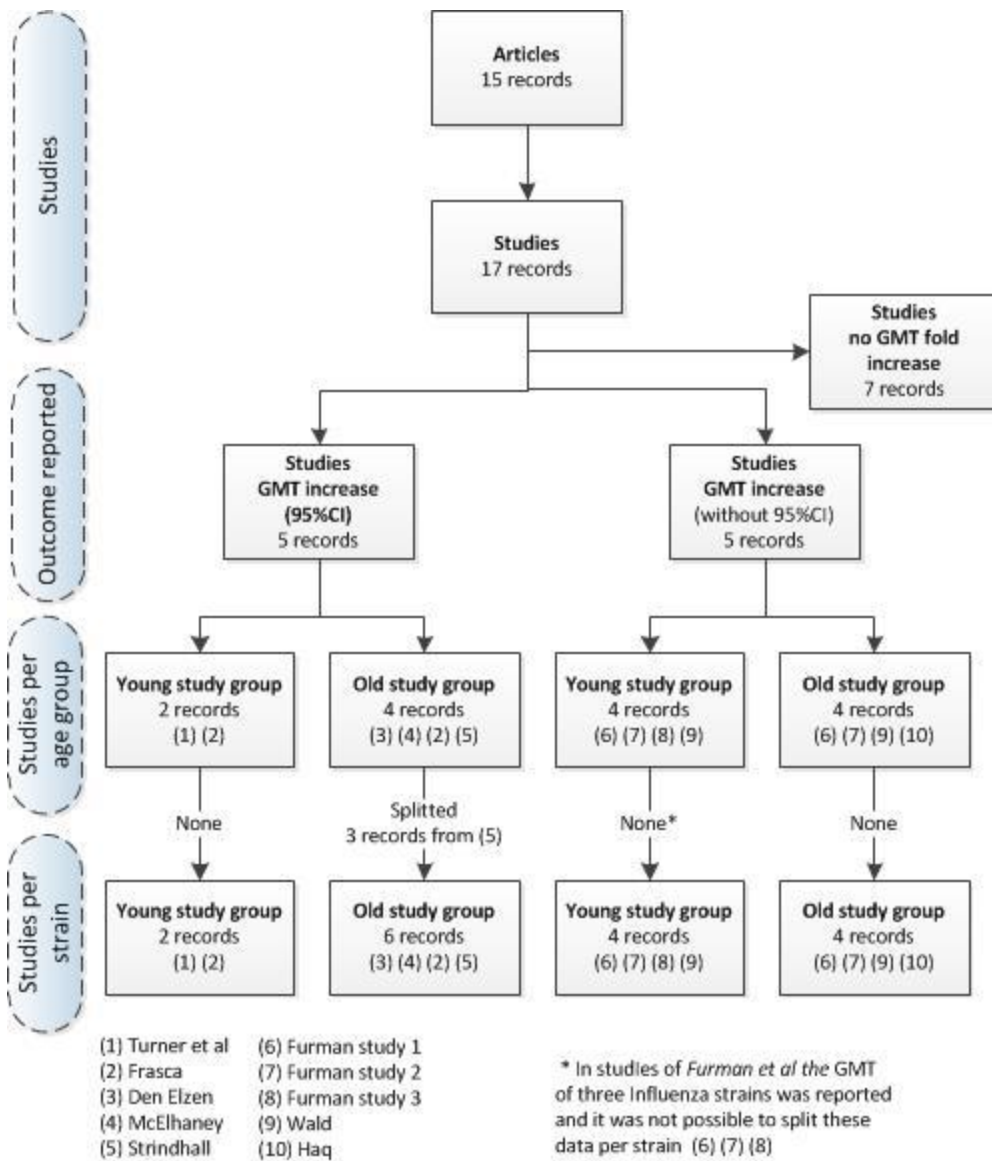

**Supplementary figure 2. Flow diagram of number of records available for influenza GMT fold increase (outcome A) with and without 95% confidence interval (CI).**

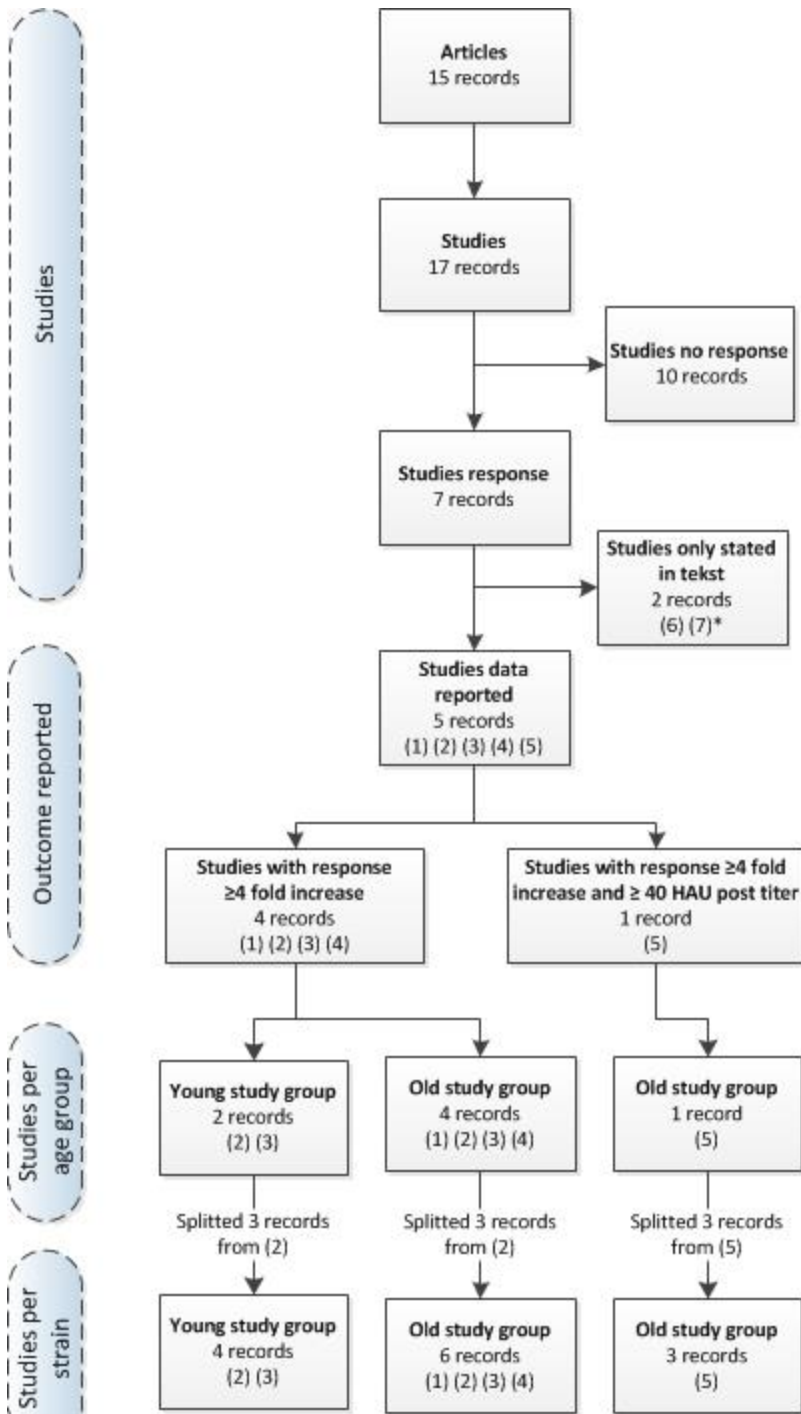

- (1) Den Elzen
- (2) Derhovanessivan
- (3) Frasca
- (4) Guidi
- (5) Strindhall
- (6) Turner
- (7) Wald

\*Both studies that reported a conclusion in tekst without data shown, stated that no difference was found in response to influenza vaccination between CMV-seropositive and CMV-seronegative individuals

**Supplementary figure 3. Flow diagram of number of records available for effect of CMV-serostatus on response to influenza vaccination (outcome B)**

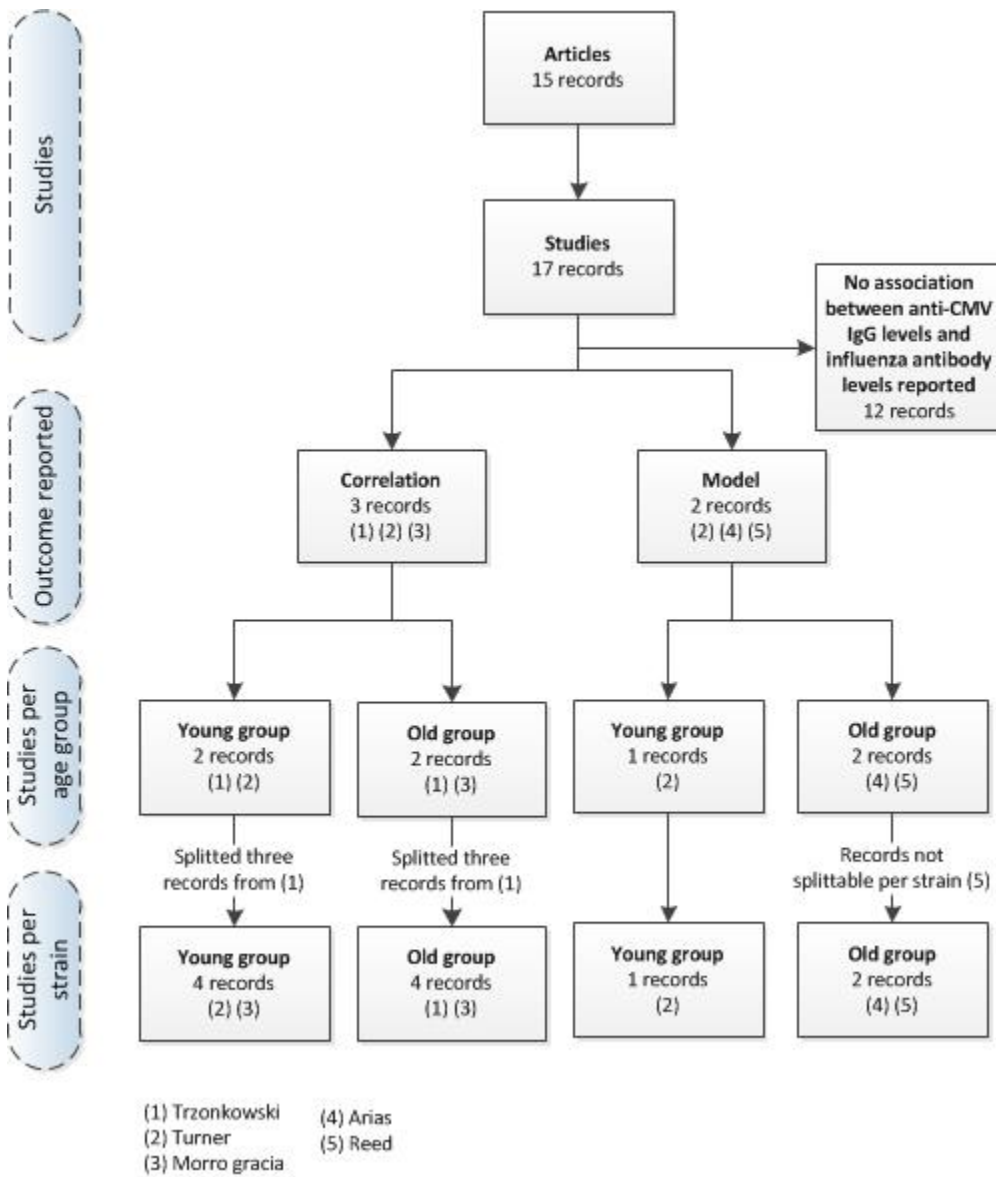

Supplementary figure 4. Flow diagram of number of records available for correlation influenza antibody titers and CMV IgG levels (outcome C)

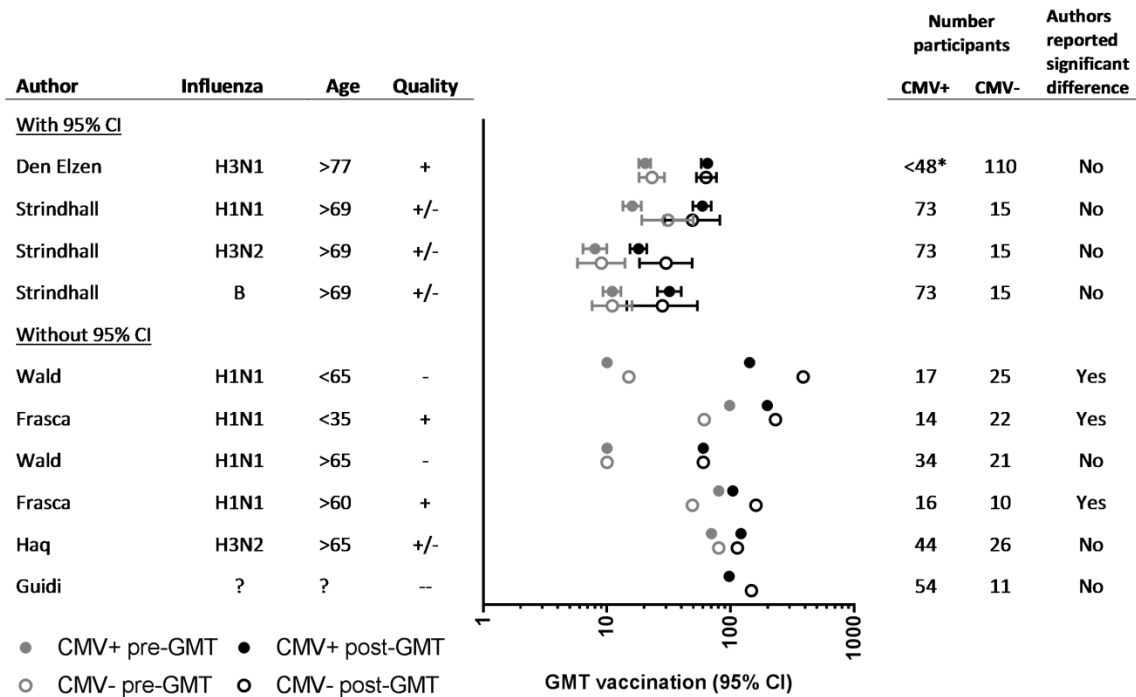

**Supplementary figure 5. Pre-vaccination geometric mean titer (pre-GMT) and post-vaccination geometric mean titer (post-GMT) in CMV-seropositive versus CMV-seronegative participants.** \* Data for *Turnet et al* was not reported for CMV-seropositivity (n=48), but for different CMV-seropositive groups based on height of anti-CMV IgG level. Here, CMV-seropositive high individuals are shown (subgroup of n=48).
