# Supplementary material for: Effect of latent cytomegalovirus infection on the antibody response to influenza vaccination: a systematic review and meta-analysis
Source: Springer Nature journal article supplement (doi:10.1007/s00430-019-00602-z), 2019-04-04
Supplement: MOESM2 [file 16609392]

| Number | Query results                                                                                                                                                                                                                                                                                                                                                                                                                                                                                                                                                                                                                                                                                                           | Results |
|--------|-------------------------------------------------------------------------------------------------------------------------------------------------------------------------------------------------------------------------------------------------------------------------------------------------------------------------------------------------------------------------------------------------------------------------------------------------------------------------------------------------------------------------------------------------------------------------------------------------------------------------------------------------------------------------------------------------------------------------|---------|
| #27    | 'cytomegalovirus infection'/exp AND 'influenza vaccine'/exp OR ('cytomegalovirus infection'/exp AND 'influenza vaccination'/exp) OR ('cytomegalovirus infection'/exp AND ('influenza virus'/exp AND 'vaccine'/exp OR ('influenza virus'/exp AND 'vaccination'/exp))) OR ('cytomegalovirus'/exp AND 'influenza vaccine'/exp) OR ('cytomegalovirus'/exp AND 'influenza vaccination'/exp) OR ('cytomegalovirus'/exp AND ('influenza virus'/exp AND 'vaccine'/exp OR ('influenza virus'/exp AND 'vaccination'/exp))) OR ('cytomegalovirus'/exp/mj AND ('immune response'/exp/mj OR 'immune status'/exp/mj)) OR ('cytomegalovirus infection'/exp/mj AND ('immune response'/exp/mj OR 'immune status'/exp/mj)) AND 'human'/de | 689     |
| #26    | 'cytomegalovirus infection'/exp AND 'influenza vaccine'/exp OR ('cytomegalovirus infection'/exp AND 'influenza vaccination'/exp) OR ('cytomegalovirus infection'/exp AND ('influenza virus'/exp AND 'vaccine'/exp OR ('influenza virus'/exp AND 'vaccination'/exp))) OR ('cytomegalovirus'/exp AND 'influenza vaccine'/exp) OR ('cytomegalovirus'/exp AND 'influenza vaccination'/exp) OR ('cytomegalovirus'/exp AND ('influenza virus'/exp AND 'vaccine'/exp OR ('influenza virus'/exp AND 'vaccination'/exp))) OR ('cytomegalovirus'/exp/mj AND ('immune response'/exp/mj OR 'immune status'/exp/mj)) OR ('cytomegalovirus infection'/exp/mj AND ('immune response'/exp/mj OR 'immune status'/exp/mj))                | 837     |
| #25    | 'cytomegalovirus'/exp/mj AND ('immune response'/exp/mj OR 'immune status'/exp/mj) OR ('cytomegalovirus infection'/exp/mj AND ('immune response'/exp/mj OR 'immune status'/exp/mj))                                                                                                                                                                                                                                                                                                                                                                                                                                                                                                                                      | 429     |
| #24    | 'cytomegalovirus infection'/exp/mj AND ('immune response'/exp/mj OR 'immune status'/exp/mj)                                                                                                                                                                                                                                                                                                                                                                                                                                                                                                                                                                                                                             | 227     |
| #23    | 'cytomegalovirus'/exp/mj AND ('immune response'/exp/mj OR 'immune status'/exp/mj)                                                                                                                                                                                                                                                                                                                                                                                                                                                                                                                                                                                                                                       | 238     |
| #22    | 'immune response'/exp/mj OR 'immune status'/exp/mj                                                                                                                                                                                                                                                                                                                                                                                                                                                                                                                                                                                                                                                                      | 92,574  |
| #21    | 'cytomegalovirus'/exp/mj                                                                                                                                                                                                                                                                                                                                                                                                                                                                                                                                                                                                                                                                                                | 14,375  |
| #20    | 'cytomegalovirus infection'/exp/mj                                                                                                                                                                                                                                                                                                                                                                                                                                                                                                                                                                                                                                                                                      | 16,489  |
| #19    | 'immune status'/exp/mj                                                                                                                                                                                                                                                                                                                                                                                                                                                                                                                                                                                                                                                                                                  | 932     |
| #18    | 'immune response'/exp/mj                                                                                                                                                                                                                                                                                                                                                                                                                                                                                                                                                                                                                                                                                                | 91,662  |
| #17    | 'cytomegalovirus infection'/exp AND 'influenza vaccine'/exp OR ('cytomegalovirus infection'/exp AND 'influenza vaccination'/exp) OR ('cytomegalovirus infection'/exp AND ('influenza virus'/exp AND 'vaccine'/exp OR ('influenza virus'/exp AND 'vaccination'/exp))) OR ('cytomegalovirus'/exp AND 'influenza vaccine'/exp) OR ('cytomegalovirus'/exp AND 'influenza vaccination'/exp) OR ('cytomegalovirus'/exp AND ('influenza virus'/exp AND 'vaccine'/exp OR ('influenza virus'/exp AND 'vaccination'/exp)))                                                                                                                                                                                                        | 414     |
| #16    | 'cytomegalovirus'/exp AND ('influenza virus'/exp AND 'vaccine'/exp OR ('influenza virus'/exp AND 'vaccination'/exp))                                                                                                                                                                                                                                                                                                                                                                                                                                                                                                                                                                                                    | 122     |
| #15    | 'cytomegalovirus'/exp AND 'influenza vaccination'/exp                                                                                                                                                                                                                                                                                                                                                                                                                                                                                                                                                                                                                                                                   | 41      |
| #14    | 'cytomegalovirus'/exp AND 'influenza vaccine'/exp                                                                                                                                                                                                                                                                                                                                                                                                                                                                                                                                                                                                                                                                       | 134     |
| #13    | 'cytomegalovirus infection'/exp AND ('influenza virus'/exp AND 'vaccine'/exp OR ('influenza virus'/exp AND 'vaccination'/exp))                                                                                                                                                                                                                                                                                                                                                                                                                                                                                                                                                                                          | 47      |
| #12    | 'cytomegalovirus infection'/exp AND 'influenza vaccination'/exp                                                                                                                                                                                                                                                                                                                                                                                                                                                                                                                                                                                                                                                         | 72      |
| #11    | 'cytomegalovirus infection'/exp AND 'influenza vaccine'/exp                                                                                                                                                                                                                                                                                                                                                                                                                                                                                                                                                                                                                                                             | 203     |
| #10    | 'influenza virus'/exp AND 'vaccine'/exp OR ('influenza virus'/exp AND 'vaccination'/exp)                                                                                                                                                                                                                                                                                                                                                                                                                                                                                                                                                                                                                                | 13,079  |
| #9     | 'influenza virus'/exp AND 'vaccination'/exp                                                                                                                                                                                                                                                                                                                                                                                                                                                                                                                                                                                                                                                                             | 6,925   |
| #8     | 'influenza virus'/exp AND 'vaccine'/exp                                                                                                                                                                                                                                                                                                                                                                                                                                                                                                                                                                                                                                                                                 | 11,990  |
| #7     | 'vaccine'/exp                                                                                                                                                                                                                                                                                                                                                                                                                                                                                                                                                                                                                                                                                                           | 286,298 |
| #6     | 'vaccination'/exp                                                                                                                                                                                                                                                                                                                                                                                                                                                                                                                                                                                                                                                                                                       | 143,378 |
| #5     | 'influenza virus'/exp                                                                                                                                                                                                                                                                                                                                                                                                                                                                                                                                                                                                                                                                                                   | 54,474  |
| #4     | 'influenza vaccination'/exp                                                                                                                                                                                                                                                                                                                                                                                                                                                                                                                                                                                                                                                                                             | 13,281  |
| #3     | 'influenza vaccine'/exp                                                                                                                                                                                                                                                                                                                                                                                                                                                                                                                                                                                                                                                                                                 | 30,951  |
| #2     | 'cytomegalovirus'/exp                                                                                                                                                                                                                                                                                                                                                                                                                                                                                                                                                                                                                                                                                                   | 34,775  |
| #1     | 'cytomegalovirus infection'/exp                                                                                                                                                                                                                                                                                                                                                                                                                                                                                                                                                                                                                                                                                         | 34,353  |

**Supplementary Table 1. Literature search strategy for the effect of CMV-infection on the immune response to influenza vaccination.** Results represent the number of articles. Search was performed on 27 June 2017.

## Data extraction form per study

---

### Characteristics of studies (Summarized in Table 1)

---

|                      |                              |                    |                    |                                  |                    |                       |          |
|----------------------|------------------------------|--------------------|--------------------|----------------------------------|--------------------|-----------------------|----------|
| Primary study design | Design for research question | Original paper URL | Conclusion/summary | Population (sample size and age) | Exclusion criteria | Setting (country etc) | Timeline |
|----------------------|------------------------------|--------------------|--------------------|----------------------------------|--------------------|-----------------------|----------|

### Influenza vaccine outcomes (Summarized in Table 2)

---

|                          |                      |                         |                          |                   |          |
|--------------------------|----------------------|-------------------------|--------------------------|-------------------|----------|
| Increase GMT (outcome 1) | Response (outcome 2) | Correlation (outcome 3) | Antibodies (another way) | Model (corrected) | Cellular |
|--------------------------|----------------------|-------------------------|--------------------------|-------------------|----------|

### Conclusion articles (Summarized in Figure 3, and Supplementary table 3)

---

|                                               |                                          |                                        |                    |
|-----------------------------------------------|------------------------------------------|----------------------------------------|--------------------|
| Influenza virus strain(s) antibodies measured | Reported effect of CMV Young study group | Reported effect of CMV Old study group | Statistical method |
|-----------------------------------------------|------------------------------------------|----------------------------------------|--------------------|

### Risk of bias and study quality of studies included for systematic assessment (summarized in Table 3)

---

|                    |                                |                    |                        |                  |                     |
|--------------------|--------------------------------|--------------------|------------------------|------------------|---------------------|
| Study controls for | Statistical method appropriate | Selection (max 4*) | Comparability (max 2*) | Outcome (max 3*) | Overall score (+/-) |
|--------------------|--------------------------------|--------------------|------------------------|------------------|---------------------|

### Influenza vaccination (summarized in Supplementary table 4)

---

|              |                               |      |                           |         |
|--------------|-------------------------------|------|---------------------------|---------|
| Type vaccine | year and pandemic or seasonal | Dose | influenza virus strain(s) | Booster |
|--------------|-------------------------------|------|---------------------------|---------|

### Time and type of measurement of influenza and CMV antibodies (summarized in Supplementary table 5)

---

|                                |                      |                     |                          |                          |                     |
|--------------------------------|----------------------|---------------------|--------------------------|--------------------------|---------------------|
| Influenza antibody measurement |                      |                     | CMV antibody measurement |                          |                     |
| Time after vaccination         | Assay of measurement | Vaccination history | Assay of measurement     | Cut-off CMV-seropositive | Borderline handling |

## Supplementary Table 2. Data extraction form per study.

| Study                           | Influenza virus strain(s) antibodies measured      | Reported effect of CMV                                                                                 |                                                                                                             |
|---------------------------------|----------------------------------------------------|--------------------------------------------------------------------------------------------------------|-------------------------------------------------------------------------------------------------------------|
|                                 |                                                    | Young                                                                                                  | Old                                                                                                         |
| Turner et al, 2014              | A/H3N2<br>A/H1N1<br>A/H1N1<br>B Vic                | <b>Negative</b><br>Brisbane H1N1 or H3N2*<br><b>No effect</b><br>Brisbane H1N1 or H3N2*<br>B Vic       | -                                                                                                           |
| Den Elzen et al, 2011           | A/H3N2                                             | -                                                                                                      | <b>No effect</b><br>A/H3N2                                                                                  |
| Derhovanessian et al, 2012      | A/H1N1<br>A/H3N2<br>B Vic                          | <b>No effect</b><br>A/H1N1<br>A/H3N2<br>B Vic                                                          | <b>Negative</b><br>A/H3N2<br><b>No effect</b><br>A/H1N1<br>B Vic                                            |
| Nielsen et al, 2015             | A/H1N1                                             | <b>No effect</b><br>A/H1N1 (age range 21-77)                                                           |                                                                                                             |
| Furman et al, 2015 – study 1 ** | A/H1N1<br>A/H3N2<br>B Vic                          | <b>Positive</b><br>GM of the strains<br>A/H1N1, A/H3N2, B Vic                                          | <b>No effect</b><br>GM of the strains A/H1N1,<br>A/H3N2, B Vic                                              |
| Furman et al, 2015 – study 2 ** | A/H1N1<br>A/H3N2<br>B Vic                          | <b>Positive</b><br>GM of the strains<br>A/H1N1, A/H3N2, B Vic                                          | <b>No effect</b><br>GM of the strains A/H1N1,<br>A/H3N2, B Vic                                              |
| Furman et al, 2015 – study 3 ** | A/H1N1<br>A/H3N2<br>B Vic                          | <b>Positive</b><br>GM of the strains<br>A/H1N1, A/H3N2, B Vic                                          | <b>No effect</b><br>GM of the strains A/H1N1,<br>A/H3N2, B Vic                                              |
| Haq et al, 2016                 | A/H3N2                                             | -                                                                                                      | <b>No effect</b><br>A/H3N2                                                                                  |
| McElhaney et al, 2015           | Unkown which strain was measured                   | -                                                                                                      | <b>Positive</b><br>Unkown which strain                                                                      |
| Frasca et al, 2015              | A/H1N1<br>A/H3N2<br>B Vic                          | <b>Negative</b><br>A/H1N1<br>Others were not shown<br>'because low titers'                             | <b>Negative</b><br>A/H1N1<br>Others were not shown<br>'because low titers'                                  |
| Trzonkowski et al, 2003         | A/H1N1<br>A/H3N2<br>B Yam                          | <b>Negative</b><br>H1N1<br><b>No effect</b><br>A/H3N2<br>B Yam<br>(not significant: P=0.07 and P=0.08) | <b>Negative</b><br>A/H1N1<br>A/H3N2<br>B Yam<br>1                                                           |
| Strindhall et al, 2015          | A/H1N1<br>A/H3N2<br>B Vic                          | -                                                                                                      | <b>No effect</b><br>A/H1N1<br>A/H3N2<br>B Vic                                                               |
| Reed et al, 2016                | A/H1N1<br>A/H3N2<br>B<br>(For each year performed) | -                                                                                                      | <b>Negative</b><br>Averaged strains per year. On persistence and on peak in combination with other factors. |
| Wald et al, 2013                | A/H1N1pdm                                          | <b>Positive</b><br>A/H1N1pdm                                                                           | <b>No effect</b><br>A/H1N1pdm                                                                               |

|                                |                                  |   |                                         |
|--------------------------------|----------------------------------|---|-----------------------------------------|
| <b>Arias et al, 201</b>        | Unkown which strain was measured | - | <b>Negative</b><br>Unkown               |
| <b>Moro-Garcia et al, 2011</b> | Unkown which strain was measured | - | <b>Negative</b><br>Unkown               |
| <b>Guidi et al, 2014</b>       | A/H1N1 or A/H1N1pdm              | - | <b>No effect</b><br>A/H1N1 or A/H1N1pdm |

\* Unkown for which influenza A/Brisbane strain a negative effect respectively no effect was found in this study (H1N1 or H3N2)

- not investigated in this study for this age group.

\*\* Studies from Furman et al (1) reported a geometric mean of three influenza strains, no data of individual strains was reported.

**Supplementary Table 3. Conclusion reported by articles.**
